# Supplementary material
Source: PubMed Central journal article supplement (PMC3457382)
Supplement: AAC.00946-12_zac999101239so1.pdf [file AAC.00946-12_zac999101239so1.pdf]

413 Supplemental Table 1: Activity of compounds in lipid and protein kinase assays

|                        |          | <b>IC<sub>50</sub> [μM]</b> |                   |                   |
|------------------------|----------|-----------------------------|-------------------|-------------------|
|                        |          | <b>compound 1</b>           | <b>compound 3</b> | <b>compound 6</b> |
| <b>lipid kinases</b>   | PI4KIIIα | > 10                        | > 10              | > 10              |
|                        | PI4KIIβ  | > 10                        | > 10              | > 10              |
|                        | PI3Kα    | > 9.1                       | > 9.1             | > 9.1             |
|                        | PI3Kβ    | > 9.1                       | > 9.1             | > 9.1             |
|                        | PI3Kδ    | > 9.1                       | > 9.1             | > 9.1             |
|                        | PI3Kγ    | > 9.1                       | > 9.1             | > 9.1             |
|                        | VPS34    | > 9.1                       | > 9.1             | > 9.1             |
|                        | PI3KC2β  | > 10                        | > 10              | > 10              |
| <b>protein kinases</b> | ABL1     | > 10                        | > 10              | > 10              |
|                        | AKT1     | > 10                        | > 10              | > 10              |
|                        | ALK      | > 10                        | > 10              | > 10              |
|                        | AURKA    | > 10                        | > 10              | > 10              |
|                        | BTK      | > 10                        | > 10              | > 10              |
|                        | CAMK2D   | > 10                        | > 10              |                   |
|                        | CDK2AP1  | > 10                        | > 10              | > 10              |
|                        | CDK4     | > 10                        | > 10              | > 10              |
|                        | CSNK1G3  | > 10                        | > 10              |                   |
|                        | EGFR     | > 10                        | > 10              | > 10              |
|                        | EPHA4    | > 10                        | > 10              | > 10              |
|                        | EPHB4    | > 10                        | > 10              | > 10              |
|                        | ERBB2    | > 10                        | > 10              | > 10              |
|                        | ERBB4    | > 10                        | > 10              |                   |
|                        | FGFR1    | > 10                        |                   |                   |
|                        | FGFR2    | > 10                        | > 10              |                   |
|                        | FGFR3    | > 10                        | > 10              | > 10              |
|                        | FGFR4    | > 10                        | > 10              | > 10              |
|                        | FLT3     | > 10                        | > 10              |                   |
|                        | FYN      | > 10                        |                   |                   |
|                        | GSK3B    | > 10                        | > 10              | > 10              |
|                        | HCK      | > 10                        |                   |                   |
|                        | IGF1R    | > 10                        | > 10              | > 10              |
|                        | INSR     | > 10                        | > 10              | > 10              |
|                        | JAK1     | > 10                        | > 10              | > 10              |
|                        | JAK2     | > 10                        | > 10              | > 10              |
|                        | JAK3     | > 10                        | > 10              | > 10              |
|                        | KDR      | > 10                        | > 10              | > 10              |
|                        | KIT      | > 10                        | > 10              | > 10              |
|                        | LCK      | > 10                        | > 10              | > 10              |
| MAP3K8                 | > 10     | > 10                        | > 10              |                   |

|          |      |      |      |
|----------|------|------|------|
| MAPK1    | > 10 | > 10 | > 10 |
| MAPK9    | > 10 | > 10 |      |
| MAPK10   | > 10 | > 10 |      |
| MAPK14   |      | > 10 | > 10 |
| MAPKAPK2 | > 10 | > 10 | > 10 |
| MAPKAPK5 | > 10 | > 10 | > 10 |
| MERTK    | > 10 | > 10 |      |
| MET      | > 10 | > 10 | > 10 |
| MKNK2    | > 10 | > 10 | > 10 |
| MST1R    | > 10 |      |      |
| MTOR     |      | > 10 |      |
| PAK2     | > 10 |      |      |
| PDGFRA   | > 10 | > 10 | > 10 |
| PDPK1    | > 10 | > 10 | > 10 |
| PKN1     | > 10 | > 10 | > 10 |
| PKN2     | > 10 | > 10 | > 10 |
| PRKACA   | > 10 | > 10 | > 10 |
| PRKCA    | > 10 | > 10 | > 10 |
| PRKCQ    | > 10 | > 10 | > 10 |
| RET      | > 10 | > 10 | > 10 |
| ROCK2    | > 10 | > 10 | > 10 |
| RPS6KB1  | > 10 |      |      |
| SRC      | > 10 | > 10 |      |
| SYK      | > 10 | > 10 | > 10 |
| TYK2     | > 10 | > 10 | > 10 |
| WNK1     | > 10 |      |      |
| YES1     | > 10 | > 10 |      |
| ZAP70    | > 10 | > 10 |      |

---

414

415

416

417

418

419

420

421

422

423
